# Supplementary material
Source: publisher figshare collection journal article supplement (https://geolsoc.figshare.com/ndownloader/files/24635021)
Supplement: Supplementary file 1 [file 24635021]

## Sheet: Age calculation criteria
Age calculation In-house ArMaDiLo software (Schwanethal, 2006) was used to correct measured data for blank, 37Ar decay, 39Ar decay, atmospheric 40Ar/36Ar ratio (298.56 - Lee et al., 2006) and neutron-induced interference reactions. ArMaDiLo was also used for the calculation of the error propagation, J value, 40Ar/39Ar ratio, 38Ar/39Ar ratio, 37Ar/39Ar ratio, 40Ar/36Ar ratio and age of the sample.…
Ludwig, K. 2003. Isoplot/Ex3.00. The Geochronological Toolkit for Excel. University of California Berkeley, Berkeley Geochronology Center, Special Publication, 1a
York, D. 1969. Least squares fitting of a straight line with correlated errors. Earth and Planetary Science Letters, 5, 320–324, https://doi.org/10.1016/S0012-821X(68)80059-7

## Sheet: Ages Summary table
K2O content, totals and CIA data of the glass shards and plateau and isochron ages for the analysed samples with relative 39Ar* comprised within plateau, 40Ar/36Ar isochron intercepts and MSWD values.
Sample ID	K2O*	CIA*	Totals*	Plateau age ± 2	MSWD	39Ar*	Isochron age ± 2	MSWD	40Ar/36Ar	Weighted mean age ± 2
	Wt %		Wt %	(Ma)		(%)	(Ma)			(Ma)
BJ-1-10	5.1 - 6.5 (Av. 5.8)	55.1 - 57.4 (Av. 56.5)	93.6 - 94..8 (Av. 94.1)	10.67 ± 0.21	0.72	89.6	10.13 ± 0.92	0.53	317 ± 120	N.A
SRD-1-2	5.1 - 6.1 (Av. 5.5)	55.1 - 57.2 (Av. 56.3)	92.8 - 95.9 (Av. 94.0)	10.70 ± 0.18	0.99	100	10.65 ± 0.28	1.14	293 ± 32	N.A
PRD-1-2A	5.6 - 5.9 (Av. 5.8)	55.9 - 58.0 (Av. 56.9)	95.6 - 96.0 (Av. 95.0)	12.00 ± 0.24	0.31	75.4	11.86 ± 0.85	0.35	320 ± 190	N.A
MA-1-5M_1	5.3 - 6.4 (Av. 5.8)	56.1 - 60.6 (Av. 58.3)	91.3 - 95.1 (Av. 92.9)	10.42 ± 0.77	1.6	93.6	11.60 ± 3.70	1.7	208 ± 120	Age spectra 10.77±0.18 MSWD = 0.88 Isochron 10.9±1.2 MSWD = 0.17
MA-1-5M_2				10.79 ± 0.18	1.5	84.5	10.80 ± 1.30	1.9	294 ± 83
AR-1-6A_1	5.3 - 6.7 (Av. 5.9)	53.8 - 57.8 (Av. 56.1)	95.1 - 96.2 (Av. 95.5)	11.64 ± 0.21	0.7	92.1	11.51 ± 0.47	0.85	326 ± 170	Age spectra 11.44±0.44 MSWD = 3.0 Isochron 11.34±0.17 MSWD = 0.36
AR-1-6A_2				11.30 ± 0.18	0.91	80.9	11.30 ± 0.21	0.91	251 ± 78
AR-1-6A_3				11.42 ± 0.22	0.23	93.2	11.38 ± 0.37	0.19	253 ± 140
Note: In bold preferred ages for the considered samples, selection criteria are listed supplementary information table. * Mean values from EMPA data reported in Appendix 2.

## Sheet: AR-1-6A
Ar-Ar DATA OF SAMPLE AR-1-6A_1 QUOTED AS cc SPT X 10-12 (ALL THE ERRORS ARE QUOTED AT 1s LEVEL)
Step	40Ar	+/-	39Ar	+/-	38Ar	+/-	37Ar	+/-	36Ar	+/-	40Ar*/39Ar	+/-	Age (Ma)	+/- (Ma)	39/40	+/-	36/40	+/-
1	490.2	1.31797	588.065	2.1183	7.2414	0.318325	29.6068	0.234581	0.16328	0.0351887	0.750702	0.0182037	12.9888	0.313575	1.19964	0.0053923	0.000333088	7.17899e-05
2	191.045	1.98052	261.231	2.42259	3.24118	0.184656	14.5539	0.234639	0.0198879	0.0351887	0.7086	0.0414418	12.2629	0.714146	1.36738	0.0190195	0.000104101	0.000184194
3	156.344	1.78674	231.852	1.64521	2.63864	0.184656	12.2433	0.234761	0.0696272	0.0351887	0.584686	0.0461417	10.1244	0.796039	1.48296	0.0199488	0.000445345	0.000225129
4	383.096	2.58932	559.43	5.14615	7.19119	0.10142	28.292	0.234819	0.0489987	0.0351887	0.658653	0.020265	11.4012	0.349376	1.46029	0.0166692	0.000127902	9.18575e-05
5	661.987	3.57679	946.919	2.50714	11.2751	0.318325	46.5408	0.234938	0.0769141	0.0507844	0.67485	0.0165453	11.6807	0.285205	1.43042	0.00860679	0.000116187	7.67177e-05
6	587.269	2.52298	871.967	3.91102	11.0408	0.335046	38.0134	0.235	0.0136712	0.0351887	0.668819	0.0127468	11.5766	0.219739	1.48478	0.00922174	2.32792e-05	5.99194e-05
7	556.859	2.73902	824.612	4.6893	9.83568	0.351769	38.3578	0.235119	-0.00279576	0.0351887	0.67631	0.0137142	11.7059	0.2364	1.48083	0.011134	n.d	n.d
8	407.478	2.53931	579.741	3.01448	6.83971	0.351769	25.688	0.23518	0.08244	0.0351887	0.660415	0.0189537	11.4316	0.326764	1.42276	0.0115473	0.000202318	8.63665e-05
9	562.379	3.37491	826.929	3.35277	9.78547	0.418673	40.8501	0.2353	0.0129194	0.0507844	0.675418	0.0189793	11.6905	0.32716	1.47041	0.0106493	2.29728e-05	9.03029e-05
10	551.888	2.77219	799.97	3.47118	9.4842	0.418673	39.0474	0.235358	0.0297728	0.0208269	0.678776	0.00900428	11.7484	0.155209	1.44952	0.00962153	5.39472e-05	3.77385e-05
11	567.424	5.86378	724.269	4.01254	8.58039	0.335046	36.509	0.235474	0.243329	0.0667547	0.683159	0.0289275	11.824	0.498609	1.27642	0.0149665	0.000428831	0.000117729
12	138.112	2.75519	182.164	1.13906	1.95241	0.118016	9.95777	0.235532	0.0866086	0.0351887	0.616254	0.0597365	10.6694	1.03028	1.31896	0.0275742	0.000627091	0.000255091
J value = 0.009531765±0.0000477								n.d.= not determined due to 36Ar within error to 0
values excluded from the isochron age calculation
Ar-Ar DATA OF SAMPLE AR-1-6A_2 QUOTED AS cc SPT X 10-12 (ALL THE ERRORS ARE QUOTED AT 1s LEVEL)
Step	40Ar	+/-	39Ar	+/-	38Ar	+/-	37Ar	+/-	36Ar	+/-	40Ar*/39Ar	+/-	Age (Ma)	+/- (Ma)	39/40	+/-	36/40	+/-
1	614.501	4.125	779.715	4.4701	9.8912	0.268239	39.3254	0.288141	0.407158	0.0515683	0.632236	0.0207575	10.9092	0.356774	1.26886	0.0112011	0.000662584	8.40367e-05
2	276.415	2.66039	386.066	2.42398	4.55199	0.318381	19.4115	0.288212	0.101298	0.0363108	0.637655	0.0291841	11.0024	0.501585	1.39669	0.0160501	0.00036647	0.000131411
3	802.496	3.22019	1184.94	4.50393	13.6738	0.60274	54.2144	0.28837	0.108451	0.0363108	0.649924	0.00985683	11.2134	0.16939	1.47657	0.00816122	0.000135142	4.52506e-05
4	789.779	3.22006	1166.36	3.11704	12.7533	0.519085	52.8761	0.288437	0.0596783	0.0363108	0.661857	0.00985428	11.4187	0.169327	1.47682	0.00719945	7.55633e-05	4.5977e-05
5	760.538	4.36536	1134.37	4.84228	13.7743	0.619472	53.8351	0.288584	0.108551	0.0363108	0.641883	0.0106589	11.0751	0.183186	1.49154	0.0106692	0.000142729	4.77506e-05
6	994.696	6.34984	1445.66	5.9251	17.3728	0.40199	64.8055	0.288659	0.154771	0.0363109	0.6561	0.00909593	11.3197	0.156305	1.45337	0.0110255	0.000155596	3.6518e-05
7	792.578	3.98194	1172.94	3.08322	13.7408	0.45217	60.2195	0.288802	0.0577323	0.0515683	0.661027	0.0136664	11.4044	0.234834	1.47991	0.00839128	7.28411e-05	6.5065e-05
8	564.798	2.9062	821.519	3.59054	9.82425	0.28495	40.078	0.288869	0.0303185	0.0363108	0.676488	0.0139759	11.6703	0.240118	1.45454	0.00981989	5.36803e-05	6.42905e-05
9	719.517	3.32671	1047.96	4.5716	13.088	0.301665	49.9959	0.289023	-0.0378124	0.0226713	0.697358	0.00781238	12.0291	0.134198	1.45648	0.00925838	n.d	n.d
10	600.419	3.38786	859.238	3.81041	10.1925	0.268239	49.0737	0.289091	0.0934373	0.0363108	0.666321	0.0135426	11.4954	0.232694	1.43106	0.0102702	0.00015562	6.04821e-05
J value = 0.009500195±0.0000475								n.d.= not determined due to 36Ar within error to 0
values excluded from the isochron age calculation
Ar-Ar DATA OF SAMPLE AR-1-6A_3 QUOTED AS cc SPT X 10-12 (ALL THE ERRORS ARE QUOTED AT 1s LEVEL)
Step	40Ar	+/-	39Ar	+/-	38Ar	+/-	37Ar	+/-	36Ar	+/-	40Ar*/39Ar	+/-	Age (Ma)	+/- (Ma)	39/40	+/-	36/40	+/-
1	400.813	3.74874	528.893	1.56028	6.16364	0.235363	25.0515	0.112495	0.266133	0.0520564	0.607603	0.0302816	10.4506	0.51	1.31955	0.0129409	0.000663983	0.000130025
2	560.267	4.28686	805.821	4.02928	9.645	0.352179	36.9719	0.112552	0.0992176	0.0370007	0.658515	0.0150691	11.3235	0.258087	1.43828	0.0131465	0.00017709	6.60552e-05
3	638.896	1.79831	917.499	2.67595	11.4861	0.402304	47.2394	0.112584	0.0964967	0.0520564	0.664945	0.0171624	11.4338	0.293922	1.43607	0.00582078	0.000151037	8.14797e-05
4	401.866	2.60211	602.173	3.16647	6.83313	0.235363	29.1035	0.11264	0.00304873	0.0370007	0.665848	0.0191696	11.4492	0.328294	1.49844	0.012499	7.58644e-06	9.20723e-05
5	559.878	3.13095	829.482	2.92966	9.7789	0.302082	36.4897	0.112667	0.0338427	0.0370007	0.662792	0.014039	11.3969	0.240435	1.48154	0.00979914	6.04466e-05	6.6088e-05
6	877.695	2.89912	1209.83	4.08004	13.8126	0.435732	58.7528	0.112728	0.289954	0.0677274	0.653916	0.017028	11.2447	0.291649	1.37842	0.0065069	0.000330358	7.71728e-05
7	323.614	2.11488	488.376	3.18339	5.86237	0.318777	24.3519	0.112754	0.0043079	0.0370007	0.659999	0.0234289	11.349	0.401258	1.50913	0.0139296	1.33118e-05	0.000114336
8	349.521	3.69853	532.413	3.18339	6.013	0.15225	25.5006	0.11281	-0.0123722	0.0237606	0.663422	0.0155411	11.4077	0.266159	1.52327	0.018514	n.d	n.d
9	374.323	1.79804	563.52	2.57448	6.93355	0.335476	26.8807	0.112838	-0.0291136	0.0370007	0.679685	0.0201027	11.6864	0.344231	1.50544	0.00997967	n.d	n.d
10	478.44	2.29221	700.198	1.9489	7.65326	0.335476	33.1029	0.112893	0.0183646	0.0370007	0.675462	0.0162222	11.614	0.277794	1.4635	0.00810903	3.83842e-05	7.73364e-05
11	392.07	9.10915	573.844	2.30392	6.93355	0.335476	26.5691	0.112923	0.0855987	0.0677274	0.638699	0.0387327	10.9838	0.65766	1.46363	0.0345091	0.000218325	0.000172818
J value = 0.00946862±0.0000473								n.d.= not determined due to 36Ar within error to 0
values excluded from the isochron age calculation

## Sheet: MA-1-5M
Ar-Ar DATA OF SAMPLE MA-1-5M_1 QUOTED AS cc SPT X 10-12 (ALL THE ERRORS ARE QUOTED AT 1s LEVEL)
Step	40Ar	+/-	39Ar	+/-	38Ar	+/-	37Ar	+/-	36Ar	+/-	40Ar*/39Ar	+/-	Age (Ma)	+/- (Ma)	39/40	+/-	36/40	+/-
1	19.7287	0.322632	9.33511	0.218542	0.137419	0.0265159	-167.001	148.627	0.0980081	0.0411066	-1.02115	-1.31536	-20.9368	22.4923	0.473173	0.0135124	0.00496779	0.00208517
2	41.7325	0.507906	20.4645	0.211388	0.304325	0.0345051	-167.038	148.66	0.155173	0.0434791	-0.224574	-0.634812	-5.45616	10.7772	0.490374	0.00782786	0.00371826	0.00104283
3	46.3015	0.582563	26.2918	0.286253	0.304325	0.0345051	268.831	148.725	0.00700752	0.0434957	1.68148	0.494756	28.2987	8.25772	0.56784	0.00944808	0.000151345	0.000939403
4	37.2713	0.354827	26.5914	0.325484	0.346052	0.0188381	94.4736	148.756	0.0205523	0.0435017	1.17088	0.488817	19.7521	8.19565	0.713455	0.0110633	0.000551425	0.00116718
5	72.7122	0.67547	36.8643	0.270846	0.446195	0.042631	-254.467	148.823	0.251826	0.043519	-0.067086	-0.352932	-2.05747	5.98325	0.506989	0.00600472	0.00346333	0.000599375
6	80.7886	0.597846	69.5383	0.405819	0.896842	0.042631	-79.994	148.858	0.107611	0.0435262	0.699762	0.18712	11.8306	3.15052	0.860744	0.00811202	0.00133201	0.000538857
7	104.356	0.544872	110.307	0.40583	1.46432	0.0673314	-80.0313	148.927	0.156611	0.0435429	0.522168	0.117974	8.83539	1.98946	1.05702	0.00675148	0.00150073	0.000417325
8	77.2052	0.430386	83.8838	0.438416	1.0554	0.0590666	-80.0489	148.96	0.0994607	0.0411906	0.566382	0.146725	9.58152	2.47334	1.0865	0.00830247	0.00128826	0.000533569
9	152.296	0.802962	165.545	0.770288	2.13195	0.0590666	-167.451	149.027	0.179777	0.0435674	0.595739	0.0787719	10.0768	1.3275	1.087	0.00764375	0.00118045	0.000286138
10	122.847	0.457918	136.592	0.611746	1.72303	0.0590666	-167.492	149.064	0.155293	0.0412175	0.559938	0.0901898	9.4728	1.52041	1.11188	0.00647884	0.00126412	0.000335552
11	210.495	0.875846	231.536	0.570243	2.83295	0.0673314	-429.854	149.134	0.322799	0.043596	0.492883	0.0563562	8.34101	0.950618	1.09996	0.00531848	0.00153352	0.00020721
12	273.3	1.26396	325.77	1.88238	4.11813	0.092213	269.628	149.166	0.145601	0.0436017	0.705494	0.0403541	11.9272	0.679401	1.19199	0.00882208	0.000532751	0.000159557
13	137.472	0.762832	168.33	1.04731	2.04015	0.0590666	-167.68	149.232	0.139013	0.0436165	0.570119	0.0775746	9.64457	1.30763	1.22447	0.0102081	0.00101121	0.000317326
14	157.738	0.93294	186.11	0.753574	2.24878	0.092213	94.7954	149.263	0.0857869	0.0436235	0.709931	0.0702194	12.0019	1.18217	1.17987	0.00845697	0.000543857	0.000276575
15	113.695	0.590232	138.198	0.603466	1.74806	0.0345051	-255.379	149.357	0.162253	0.0412926	0.472166	0.0893338	7.99118	1.50716	1.21552	0.00824569	0.0014271	0.000363265
16	111.786	0.738819	120.862	0.587078	1.44763	0.050828	-81.3481	151.378	0.09164	0.0441323	0.698534	0.109242	11.8099	1.83931	1.08119	0.00886813	0.000819778	0.000394829
J value = 0.009310776±0.0000597
values excluded from the isochron age calculation
TABLE A5-b. Ar-Ar DATA FROM THE ANALYSIS OF SAMPLE MA-1-5M_2 QUOTED AS cc SPT X 10-12 (ALL THE ERRORS ARE QUOTED AT 1s LEVEL)
Step	40Ar	+/-	39Ar	+/-	38Ar	+/-	37Ar	+/-	36Ar	+/-	40Ar*/39Ar	+/-	Age (Ma)	+/- (Ma)	39/40	+/-	36/40	+/-
1	135.721	1.30099	111.997	1.18952	1.45	0.0588255	-532.672	203.417	0.351406	0.0552462	0.275242	0.147732	4.64685	2.48836	0.825198	0.0118062	0.00258918	0.000407813
2	398.486	1.21099	309.579	1.43272	4.012	0.0920587	88.7969	203.459	0.701111	0.0636621	0.611166	0.0615733	10.302	1.03402	0.776889	0.00430129	0.00175944	0.000159849
3	222.411	1.07298	252.872	NA	3.39445	0.0505477	0	203.565	0.202083	NA	0.640993	0.00424316	10.8033	0.071238	1.13696	0.00548502	0.000908602	4.38336e-06
4	204.661	0.684103	245.097	0.930871	2.98553	0.100382	-355.446	203.607	0.304441	0.0570727	0.464245	0.0695864	7.83083	1.17012	1.19758	0.00605903	0.00148754	0.000278909
5	409.508	1.72398	479.306	2.16537	6.04826	0.158712	88.8993	203.694	0.34999	0.0553133	0.636411	0.0347542	10.7263	0.583508	1.17044	0.00722771	0.000854659	0.000135121
6	108.654	0.773781	135.64	0.765343	1.67532	0.06712	-266.753	203.736	0.158463	0.0553252	0.452323	0.121913	7.63015	2.05023	1.24836	0.0113425	0.00145841	0.000509291
7	112.9	0.647717	144.424	0.381659	1.77546	0.108709	177.908	203.82	0.0324629	0.0571245	0.714629	0.118167	12.0402	1.98259	1.27922	0.00808019	0.000287537	0.000505978
8	74.1943	0.691353	94.1014	0.569616	1.16626	0.06712	266.921	203.864	-0.00745547	0.0553584	0.8121	0.175825	13.6763	2.94742	1.26831	0.014093	n.d	n.d
9	110.671	0.781404	137.081	0.831401	1.73374	0.0588255	-178.023	203.951	0.10229	0.0571574	0.584599	0.124644	9.85543	2.09369	1.23863	0.0115291	0.000924271	0.000516505
10	207.766	1.29285	217.214	1.77764	2.70179	0.0588255	445.161	203.999	0.0351256	0.0571719	0.908235	0.0791417	15.2884	1.32555	1.04547	0.0107483	0.000169063	0.000275176
J value = 0.0092792±0.0000464								n.d.= not determined due to 36Ar within error to 0
values excluded from the isochron age calculation

## Sheet: BJ-1-10
Ar-Ar DATA OF SAMPLE BJ-1-10 QUOTED AS cc SPT X 10-12 (ALL ERRORS ARE AT 1s LEVEL)
Step	40Ar	+/-	39Ar	+/-	38Ar	+/-	37Ar	+/-	36Ar	+/-	40*/39	+/-	Age (Ma)	+/- (Ma)	39/40	+/-	36/40	+/-
1	170.086	1.77705	148.796	1.04837	1.90586	0.0598797	-5.64772	8.62703	0.243384	0.0188198	0.654732	0.0398734	11.2285	0.681103	0.874827	0.0110242	0.00143094	0.000111654
2	197.718	2.32835	167.854	2.03744	2.34816	0.0598797	16.9538	8.63247	0.24556	0.01882	0.741143	0.0373353	12.7052	0.637249	0.848955	0.0143575	0.00124197	9.63033e-05
3	164.871	1.19484	195.667	1.01456	2.41492	0.0844833	-9.42281	8.63614	0.13824	0.0188201	0.631675	0.029541	10.8342	0.504714	1.18679	0.0105755	0.000838472	0.000114312
4	188.262	0.482123	226.168	0.617278	2.78211	0.0762508	5.65485	8.63792	0.142409	0.0188202	0.644407	0.0249974	11.052	0.427037	1.20135	0.00449621	0.000756442	9.99869e-05
5	252.222	1.26213	333.347	1.3696	4.16744	0.101004	5.65717	8.64147	0.158739	0.0188203	0.614463	0.0174598	10.5399	0.29835	1.32164	0.00855719	0.00062936	7.46843e-05
6	206.609	1.22007	266.264	1.116	3.29952	0.0598797	-5.65841	8.64337	0.120912	0.0124179	0.640379	0.0149024	10.9831	0.254591	1.28873	0.00933227	0.000585222	6.02028e-05
7	81.1327	0.520815	112.363	0.465153	1.33838	0.0680459	28.3049	8.64728	0.0384272	0.0188205	0.619953	0.0502879	10.6338	0.859271	1.38493	0.0105786	0.000473634	0.000231992
8	226.691	1.01913	322.996	1.51331	3.99218	0.0762508	-1.88741	8.64918	0.103583	0.0124182	0.606091	0.0122385	10.3967	0.209146	1.42483	0.00925181	0.000456935	5.48189e-05
9	218.05	0.985696	304.428	0.684896	3.90873	0.109283	-9.44104	8.65286	0.105585	0.0188207	0.612713	0.0187904	10.51	0.321093	1.39613	0.00704965	0.000484222	8.63412e-05
10	511.561	1.77739	719.771	2.34178	9.19131	0.142479	28.3293	8.65476	0.21805	0.0188208	0.62028	0.0084331	10.6394	0.144096	1.40701	0.0066973	0.000426245	3.68207e-05
11	172.342	0.96903	243.5	1.04837	3.12427	0.0844833	17.009	8.66058	0.0495856	0.0188209	0.646973	0.0235824	11.0958	0.402855	1.41289	0.0100058	0.000287716	0.000109219
J value =0.009443135±0.0000472157
values excluded from the isochron age calculation

## Sheet: PRD-1-2A
Ar-Ar DATAOF SAMPLE PRD-1-2A QUOTED AS cc SPT X 10-12 (ALL THE ERRORS ARE QUOTED AT 1s LEVEL)
Step	40Ar	+/-	39Ar	+/-	38Ar	+/-	37Ar	+/-	36Ar	+/-	40Ar*/39Ar	+/-	Age (Ma)	+/- (Ma)	39/40	+/-	36/40	+/-
1	222.661	1.68572	235.332	1.41201	3.06869	0.0755981	26.748	7.35062	0.167876	0.0200269	0.733217	0.0267572	12.6343	0.459069	1.05691	0.0102098	0.000753953	9.01244e-05
2	448.466	3.05125	541.799	3.44932	6.70724	0.133801	15.0488	7.35214	0.179141	0.0200269	0.729038	0.0132288	12.5626	0.226972	1.20812	0.0112571	0.000399453	4.47391e-05
3	241.398	0.848739	319.87	0.871058	3.95329	0.11715	18.9584	7.35526	0.0556302	0.020027	0.702762	0.0189732	12.1113	0.32561	1.32507	0.00589284	0.00023045	8.29666e-05
4	221.347	1.03967	293.549	1.60643	3.6612	0.0673137	11.1545	7.35688	0.0495332	0.0141803	0.703671	0.0153393	12.1269	0.263244	1.32619	0.00956415	0.00022378	6.40721e-05
5	207.031	1.67774	287.788	1.0908	3.53602	0.100512	3.34772	7.3599	0.0189421	0.0141804	0.699739	0.0160422	12.0594	0.275317	1.39007	0.0124362	9.14941e-05	6.84981e-05
6	184.542	0.917926	252.521	0.575316	2.86005	0.100512	11.1615	7.36152	0.0332014	0.0141805	0.691549	0.0172242	11.9187	0.295625	1.36837	0.0074864	0.000179913	7.68468e-05
7	142.051	0.74698	196.164	0.626005	2.38437	0.0838947	15.0744	7.36465	0.0158345	0.0141806	0.700051	0.0220254	12.0647	0.378	1.38094	0.00849428	0.00011147	9.98288e-05
8	174.511	1.25787	226.998	0.828803	2.96854	0.0673137	-0.558489	7.36697	0.0689671	0.0141807	0.678086	0.0196103	11.6874	0.336619	1.30077	0.0105102	0.000395203	8.13094e-05
9	214.263	1.37191	303.515	0.761198	3.60279	0.0922	-0.558787	7.37091	0.0281423	0.0200274	0.678261	0.0202799	11.6904	0.348113	1.41655	0.00974103	0.000131344	9.34746e-05
10	267.151	1.39512	366.272	2.0291	4.60422	0.0922	34.6519	7.37243	0.0351414	0.0141809	0.700739	0.0127727	12.0766	0.219204	1.37103	0.010438	0.000131541	5.30865e-05
11	102.921	1.3642	129.748	1.0739	1.64164	0.0590463	3.35484	7.37556	0.0352702	0.014181	0.712091	0.0347803	12.2715	0.596834	1.26066	0.0197001	0.000342693	0.00013786
J value = 0.009491765±0.0000474588
values excluded from the isochron age calculation

## Sheet: SRD-1-2
Ar-Ar OF SAMPLE SRD-1-2 QUOTED AS cc SPT X 10-12 (ALL THE ERRORS ARE QUOTED AT 1s LEVEL)
Step	40Ar	+/-	39Ar	+/-	38Ar	+/-	37Ar	+/-	36Ar	+/-	40Ar*/39Ar	+/-	Age (Ma)	+/- (Ma)	39/40	+/-	36/40	+/-
1	143.145	1.28261	101.136	0.921647	1.21961	0.0505521	13.4223	6.89505	0.260055	0.0266868	0.647832	0.0799982	11.3021	1.39012	0.706524	0.00902945	0.00181672	0.000187141
2	252.613	1.51228	236.747	1.3443	3.04723	0.0588293	13.4253	6.89657	0.366199	0.0266868	0.605296	0.0344208	10.5622	0.59837	0.937194	0.0077329	0.00144965	0.000105999
3	290.854	2.5767	306.491	2.29111	3.94852	0.083742	17.3488	6.89969	0.340665	0.0266869	0.617199	0.0277039	10.7693	0.481544	1.05376	0.0122147	0.00117126	9.23384e-05
4	177.814	1.29117	221.104	1.46265	2.88867	0.0588293	5.59754	6.90111	0.123324	0.0194642	0.637717	0.0272472	11.1262	0.473514	1.24346	0.0122143	0.000693558	0.00010958
5	337.135	2.78971	427.401	2.11358	5.25039	0.100385	29.1196	6.90404	0.28039	0.0133738	0.592975	0.0117663	10.3478	0.204567	1.26775	0.0122209	0.000831686	4.02616e-05
6	282.12	1.11291	381.132	2.15585	4.97499	0.083742	17.3636	6.90556	0.161031	0.0194643	0.614099	0.0159054	10.7154	0.276473	1.35095	0.00931638	0.000570789	6.90298e-05
7	344.955	1.02809	482.313	2.07131	6.36866	0.158713	25.2162	6.90859	0.17528	0.0194644	0.60673	0.0125079	10.5872	0.217433	1.39819	0.0073089	0.000508124	5.64463e-05
8	203.268	1.04484	272.66	1.36121	3.66478	0.108711	13.4514	6.91001	0.080418	0.0194645	0.65746	0.0218983	11.4696	0.380483	1.34138	0.00961175	0.000395626	9.57792e-05
9	188.671	0.437529	264.815	0.617378	3.43111	0.0588293	13.457	6.91285	0.0885815	0.0194645	0.612613	0.0220489	10.6895	0.383264	1.40358	0.00461543	0.000469504	0.000103172
10	816.137	2.50064	1169.76	3.90581	14.8391	0.258798	52.718	6.91437	0.314962	0.0194647	0.617323	0.00578702	10.7715	0.100589	1.43329	0.00649533	0.000385918	2.38791e-05
11	316.86	1.71661	450.606	1.71626	5.70103	0.108711	33.0958	6.91579	0.156862	0.0194646	0.599275	0.0136375	10.4574	0.237087	1.4221	0.00941776	0.000495052	6.14883e-05
J value = 0.009606513±0.0000480326

## Sheet: Blanks
BLANK VALUES QUOTED AS cc SPT X 10-12
40Ar	+/-	39Ar	+/-	38Ar	+/-	37Ar	+/-	36Ar	+/-
Sample BJ-1-10
5.45421	0.13064	0.0734848	0.01633	0.00816498	0.00816498	0.0979798	0.01633	0.0326599	0.00816498
5.02963	0.0898148	0.0653198	0.01633	0.00816498	0.00816498	0.106145	0.01633	0.0408249	0.00816498
5.14394	0.19596	0.0571549	0.01633	0.0244949	0.00816498	0.0734848	0.01633	0.0326599	0.00816498
5.642	0.155135	0.0571549	0.01633	0.0244949	0.01633	0.138805	0.01633	0.0489899	0.00816498
5.1766	0.155135	0.0653198	0.0326599	0.00816498	0.01633	0.11431	0.01633	0.0326599	0.00816498
5.26641	0.0979798	0.0571549	0.01633	0.0489899	0.00816498	0.106145	0.01633	0.0408249	0.00816498
5.51136	0.106145	0.0408249	0.01633	0.0244949	0.00816498	0.11431	0.01633	0.0408249	0.00816498
5.47054	0.13064	0.0816498	0.01633	0.0244949	0.01633	0.13064	0.00816498	0.01633	0.00816498
Average
5.33683	0.132681	0.062258	0.0183712	0.0214331	0.0112268	0.110227	0.0153093	0.0357218	0.00816498
Sample SRD-1-2
4.58055	0.122475	0.0571549	0.01633	0.0244949	0.00816498	0.122475	0.00816498	0.0408249	0.00816498
4.41725	0.0898148	0.0408249	0.01633	0.00816498	0.01633	0.0734848	0.0244949	0.0244949	0.00816498
4.30294	0.13064	0.0816498	0.0244949	0.0244949	0.01633	0.106145	0.01633	0.0489899	0.00816498
4.47441	0.14697	0.0326599	0.0244949	0.00816498	0.01633	0.0898148	0.0244949	0.0244949	0.00816498
4.54789	0.106145	0.0489899	0.01633	0.01633	0.01633	0.0898148	0.01633	0.0244949	0.00816498
4.5234	0.0734848	0.0489899	0.01633	0.01633	0.00816498	0.0898148	0.01633	0.0326599	0.00816498
4.36826	0.0979798	0.0326599	0.0244949	0.00816498	0.00816498	0.0898148	0.01633	0.01633	0.00816498
Average
4.45925	0.109644	0.0489899	0.0198292	0.0151635	0.0128307	0.0944805	0.0174964	0.0303271	0.00816498
Sample MA-1-6A_1
6.70345	0.0979798	0.0408249	0.01633	0.0244949	0.00816498	0.0979798	0.01633	0.0408249	0.00816498
6.27887	0.11431	0.0489899	0.00816498	0.0326599	0.01633	0.0898148	0.0244949	0.0489899	0.01633
6.33602	0.106145	0.0489899	0.01633	0.0326599	0.01633	0.122475	0.01633	0.0408249	0.00816498
6.37685	0.1633	0.0408249	0.01633	0.01633	0.01633	0.0979798	0.01633	0.0408249	0.00816498
6.30336	0.0816498	0.0244949	0.01633	0.01633	0.00816498	0.11431	0.01633	0.01633	0.00816498
5.95227	0.1633	0.0326599	0.0244949	0.01633	0.01633	0.0898148	0.01633	0.0326599	0.00816498
6.1074	0.155135	0.253114	0.0244949	0.01633	0.00816498	0.0898148	0.01633	0.0326599	0.00816498
6.04209	0.0898148	0.0653198	0.01633	0.0326599	0.00816498	0.122475	0.0244949	0.0408249	0.00816498
6.14006	0.11431	0.0734848	0.0244949	0.01633	0.01633	0.0898148	0.01633	0.0408249	0.00816498
6.04209	0.171465	0.0734848	0.01633	-0.00816498	0.00816498	0.0816498	0.01633	0.0244949	0.00816498
6.1319	0.11431	0.0326599	0.00816498	0.01633	0.00816498	0.0898148	0.01633	0.0408249	0.00816498
5.63384	0.106145	0.0326599	0.01633	0.0244949	0.01633	0.0816498	0.01633	0.0326599	0.00816498
Average
6.17068	0.123155	0.063959	0.0170104	0.019732	0.0122475	0.0972993	0.0176908	0.036062	0.00884539
Sample MA-1-6A_2
6.1319	0.11431	0.0326599	0.00816498	0.01633	0.00816498	0.0898148	0.01633	0.0408249	0.00816498
5.63384	0.106145	0.0326599	0.01633	0.0244949	0.01633	0.0816498	0.01633	0.0326599	0.00816498
5.82163	0.13064	0.391919	0.0408249	0.0244949	0.00816498	0.0898148	0.01633	0.0326599	0.00816498
11.7004	0.138805	5.07045	0.0734848	0.0816498	0.01633	0.0734848	0.01633	0.0489899	0.00816498
5.39705	0.14697	0.0734848	0.01633	0.01633	0.01633	0.106145	0.01633	0.01633	0.00816498
5.45421	0.13064	0.0734848	0.01633	0.00816498	0.00816498	0.0979798	0.01633	0.0326599	0.00816498
5.02963	0.0898148	0.0653198	0.01633	0.00816498	0.00816498	0.106145	0.01633	0.0408249	0.00816498
5.14394	0.19596	0.0571549	0.01633	0.0244949	0.00816498	0.0734848	0.01633	0.0326599	0.00816498
5.642	0.155135	0.0571549	0.01633	0.0244949	0.01633	0.138805	0.01633	0.0489899	0.00816498
Average
6.21718	0.134269	0.650477	0.0244949	0.0254022	0.0117939	0.0952581	0.01633	0.0362888	0.00816498
Sample AR-1-6A_1
7.2708	0.556773	0.0163757	0.11463	0	0.0327513	-0.0163757	0.0818783	0.0163757	0.0327513
5.94437	0.294762	0.098254	0.0818783	0.0163757	0.0327513	0.180132	0.0818783	0	0.0163757
5.89524	0.507646	0.262011	0.049127	0.0327513	0.0327513	0.278386	0.049127	0.0327513	0.0327513
5.48585	0.556773	0.0327513	0.0655027	0	0.0163757	0.131005	0.0818783	0.0163757	0.0327513
6.38651	0.49127	0.0327513	0.131005	0.0327513	0.0327513	0.147381	0.0327513	0.0163757	0.0327513
6.14087	0.442143	0.11463	0.098254	0.0163757	0.0327513	0.163757	0.0327513	0.0327513	0.0327513
6.69765	0.6059	0.229259	0.147381	0.0163757	0.0327513	0.11463	0.049127	0.0327513	0.0327513
5.33847	0.835159	0.294762	0.180132	0.049127	0.049127	0.278386	0.0655027	0.049127	0.0327513
10.1529	0.802408	0.0818783	0.212884	0.0163757	0.0327513	0.442143	0.098254	0.0327513	0.0327513
Average
6.5903	0.56587	0.129186	0.120088	0.0200147	0.0327513	0.191049	0.0636831	0.0254733	0.0309318
Sample AR-1-6A_2
10.1529	0.802408	0.0818783	0.212884	0.0163757	0.0327513	0.442143	0.098254	0.0327513	0.0327513
6.91053	0.736905	0.327513	0.11463	0.0163757	0.0327513	0.147381	0.049127	0.049127	0.0327513
6.99241	0.786032	0.262011	0.163757	0	0.0327513	0.212884	0.049127	0.0327513	0.0327513
6.74677	0.802408	-0.098254	0.147381	0.049127	0.0327513	0.147381	0.049127	0.0655027	0.0327513
6.00987	0.37664	-0.0163757	0.11463	-0.0163757	0.049127	0.180132	0.0655027	0.0163757	0.0327513
5.87886	0.245635	0	0.11463	0	0.0327513	0.245635	0.0327513	0.049127	0.0327513
Average
7.11523	0.625005	0.0927954	0.144652	0.0109171	0.0354806	0.229259	0.0573148	0.0409392	0.0327513
Sample AR-1-6A_3
5.10921	0.458519	0	0.0327513	0.0327513	0.0327513	0.098254	0.0327513	-0.0163757	0.0327513
5.27296	0.540397	0.196508	0.0655027	0.049127	0.0327513	0.11463	0.049127	0.0327513	0.0163757
6.51751	0.262011	0.098254	0.229259	0.0327513	0.0327513	0.163757	0.049127	0.049127	0.0327513
6.28826	0.49127	0.212884	0.147381	0.0655027	0.0327513	0.163757	0.0327513	0.0655027	0.0327513
6.63214	0.311138	0.229259	0.11463	-0.0327513	0.049127	0.163757	0.049127	0.0327513	0.0327513
7.09066	0.524021	0.0163757	0.131005	0	0.0163757	0.196508	0.0655027	0.049127	0.0163757
5.53497	0.556773	0.262011	0.098254	0	0.0327513	0.0818783	0.0655027	0.0327513	0.0327513
Average
6.06367	0.449161	0.145042	0.116969	0.0210544	0.0327513	0.140363	0.049127	0.0350907	0.0280726
Sample PRD-1-2A
2.80875	0.0734848	0.0244949	0.01633	0.01633	0.00816498	0.106145	0.01633	0.0244949	0.00816498
4.31111	0.11431	0.0326599	0.01633	0.00816498	0.01633	0.0816498	0.01633	0.01633	0.00816498
4.39276	0.11431	0.0408249	0.01633	0.0326599	0.01633	0.106145	0.0244949	0.01633	0.00816498
4.49074	0.106145	0.0816498	0.0244949	0.01633	0.00816498	0.0979798	0.01633	0.0326599	0.00816498
4.58055	0.122475	0.0571549	0.01633	0.0244949	0.00816498	0.122475	0.00816498	0.0408249	0.00816498
4.41725	0.0898148	0.0408249	0.01633	0.00816498	0.01633	0.0734848	0.0244949	0.0244949	0.00816498
4.30294	0.13064	0.0816498	0.0244949	0.0244949	0.01633	0.106145	0.01633	0.0489899	0.00816498
Average
4.1863	0.107311	0.0513227	0.0186628	0.0186628	0.0128307	0.0991462	0.0174964	0.0291606	0.00816498
